# Supplementary material for: Pressure effects on the ionic transport properties of LiNH2
Source: Royal Society of Chemistry journal article supplement (doi:10.1039/d3tc03182a), 2023-12-29
Supplement: d3tc03182a1.pdf [file d3tc03182a1.pdf]

## Pressure effects on the ionic transport properties of $\text{LiNH}_2$

Jia Wang,<sup>a,b</sup> Hao Liu,<sup>c</sup> Li Wang,<sup>d</sup> Min Cao,<sup>b</sup> Xin Zhang,<sup>b</sup> Chunxiao Gao<sup>b</sup> and Yonghao Han<sup>b\*</sup>

*<sup>a</sup>Institute for Interdisciplinary Biomass Functional Materials Studies, Jilin Engineering Normal University, Changchun 130052, China*

*<sup>b</sup>State Key Laboratory for Superhard Materials, Institute of Physics, Jilin University, Changchun 130012, China*

*<sup>c</sup>School of Marine Technology and Environment, Dalian Ocean University, Dalian 116023, China*

*<sup>d</sup>North China Institute of Aerospace Engineering, Langfang 065000, China*

**\*Corresponding Author:** Yonghao Han

**E-mail:** [hanyh@jlu.edu.cn](mailto:hanyh@jlu.edu.cn)

**Table S1.** Detailed fitting parameters for the mixed ionic and electronic conduction in LiNH<sub>2</sub>. The  $CPE_1$  and  $CPE_2$  relate to the grain resistance ( $R_g$ ) and the grain boundary resistance ( $R_{gb}$ ), respectively.

| Pressure (GPa) | CPE1-T                 | CPE-P | W-T  | W-P   | $R_{gi}$           | $R_{ge}$           | $W_R$              | CPE2-T                 | CPE2-P | $R_{gb}$           |
|----------------|------------------------|-------|------|-------|--------------------|--------------------|--------------------|------------------------|--------|--------------------|
| 0              | $1.50 \times 10^{-12}$ | 0.890 | 8.0  | 0.440 | $1.30 \times 10^7$ | $1.40 \times 10^8$ | $1.40 \times 10^8$ | $5.80 \times 10^{-11}$ | 0.820  | $2.00 \times 10^6$ |
| 1.0            | $1.50 \times 10^{-12}$ | 0.890 | 11.0 | 0.445 | $1.70 \times 10^7$ | $1.75 \times 10^8$ | $2.15 \times 10^8$ | $5.00 \times 10^{-11}$ | 0.800  | $3.50 \times 10^6$ |
| 1.6            | $1.50 \times 10^{-12}$ | 0.890 | 11.0 | 0.400 | $1.80 \times 10^7$ | $1.80 \times 10^8$ | $1.80 \times 10^8$ | $5.80 \times 10^{-11}$ | 0.820  | $4.80 \times 10^6$ |
| 2.1            | $1.35 \times 10^{-12}$ | 0.895 | 8.0  | 0.400 | $2.15 \times 10^7$ | $1.90 \times 10^8$ | $2.30 \times 10^8$ | $6.20 \times 10^{-11}$ | 0.780  | $5.50 \times 10^6$ |
| 2.9            | $1.35 \times 10^{-12}$ | 0.895 | 9.0  | 0.420 | $2.20 \times 10^7$ | $1.95 \times 10^8$ | $2.25 \times 10^8$ | $6.80 \times 10^{-11}$ | 0.780  | $6.00 \times 10^6$ |
| 3.6            | $1.35 \times 10^{-12}$ | 0.895 | 15.0 | 0.400 | $2.40 \times 10^7$ | $2.20 \times 10^8$ | $2.40 \times 10^8$ | $6.80 \times 10^{-11}$ | 0.780  | $7.00 \times 10^6$ |
| 4.2            | $1.30 \times 10^{-12}$ | 0.900 | 14.5 | 0.445 | $2.80 \times 10^7$ | $2.35 \times 10^8$ | $2.85 \times 10^8$ | $6.00 \times 10^{-11}$ | 0.790  | $9.00 \times 10^6$ |
| 5.8            | $1.30 \times 10^{-12}$ | 0.900 | 16.0 | 0.440 | $3.35 \times 10^7$ | $2.70 \times 10^8$ | $3.20 \times 10^8$ | $4.50 \times 10^{-11}$ | 0.790  | $1.25 \times 10^7$ |
| 7.0            | $1.30 \times 10^{-12}$ | 0.900 | 16.0 | 0.435 | $3.80 \times 10^7$ | $3.10 \times 10^8$ | $3.60 \times 10^8$ | $4.80 \times 10^{-11}$ | 0.790  | $1.50 \times 10^7$ |
| 7.8            | $1.35 \times 10^{-12}$ | 0.900 | 14.5 | 0.460 | $4.05 \times 10^7$ | $3.40 \times 10^8$ | $4.30 \times 10^8$ | $5.50 \times 10^{-11}$ | 0.800  | $1.60 \times 10^7$ |
| 8.6            | $1.45 \times 10^{-12}$ | 0.900 | 16.5 | 0.460 | $3.90 \times 10^7$ | $3.30 \times 10^8$ | $4.15 \times 10^8$ | $5.00 \times 10^{-11}$ | 0.800  | $1.55 \times 10^7$ |
| 9.7            | $1.50 \times 10^{-12}$ | 0.900 | 15.0 | 0.440 | $4.30 \times 10^7$ | $3.80 \times 10^8$ | $4.55 \times 10^8$ | $4.40 \times 10^{-11}$ | 0.785  | $2.00 \times 10^7$ |
| 11.1           | $1.50 \times 10^{-12}$ | 0.900 | 18.0 | 0.420 | $5.30 \times 10^7$ | $4.90 \times 10^8$ | $5.80 \times 10^8$ | $4.00 \times 10^{-11}$ | 0.800  | $2.30 \times 10^7$ |
| 12.1           | $1.50 \times 10^{-12}$ | 0.900 | 18.0 | 0.420 | $5.60 \times 10^7$ | $5.00 \times 10^8$ | $5.90 \times 10^8$ | $4.00 \times 10^{-11}$ | 0.800  | $2.60 \times 10^7$ |
| 13.4           | $1.50 \times 10^{-12}$ | 0.900 | 18.0 | 0.420 | $5.20 \times 10^7$ | $4.80 \times 10^8$ | $5.40 \times 10^8$ | $4.00 \times 10^{-11}$ | 0.800  | $2.40 \times 10^7$ |
| 15.0           | $1.50 \times 10^{-12}$ | 0.900 | 18.0 | 0.420 | $5.20 \times 10^7$ | $4.40 \times 10^8$ | $5.20 \times 10^8$ | $4.00 \times 10^{-11}$ | 0.800  | $2.20 \times 10^7$ |
| 16.6           | $1.50 \times 10^{-12}$ | 0.900 | 16.0 | 0.420 | $5.05 \times 10^7$ | $4.00 \times 10^8$ | $5.25 \times 10^8$ | $4.20 \times 10^{-11}$ | 0.830  | $2.00 \times 10^7$ |
| 18.2           | $1.55 \times 10^{-12}$ | 0.900 | 16.0 | 0.420 | $4.95 \times 10^7$ | $4.00 \times 10^8$ | $4.15 \times 10^8$ | $4.20 \times 10^{-11}$ | 0.830  | $1.80 \times 10^7$ |
| 20.0           | $1.60 \times 10^{-1}$  | 0.900 | 16.0 | 0.420 | $4.70 \times 10^7$ | $3.85 \times 10^8$ | $4.9 \times 10^8$  | $4.20 \times 10^{-11}$ | 0.830  | $1.50 \times 10^7$ |

**Table S2.** Detailed fitting parameters for the ionic conduction in  $\text{LiNH}_2$ . The  $CPE_1$  and  $CPE_2$  relate to the grain resistance ( $R_g$ ) and the grain boundary resistance ( $R_{gb}$ ), respectively.

| Pressure (GPa) | CPE1-T                 | CPE-P | W-T  | W-P   | $R_{gi}$           | $W_R$              | CPE2-T                 | CPE2-P | $R_{gb}$           |
|----------------|------------------------|-------|------|-------|--------------------|--------------------|------------------------|--------|--------------------|
| 20.6           | $1.70 \times 10^{-12}$ | 0.910 | 6.0  | 0.375 | $3.95 \times 10^7$ | $1.15 \times 10^8$ | $6.80 \times 10^{-11}$ | 0.740  | $2.75 \times 10^7$ |
| 21.8           | $1.70 \times 10^{-12}$ | 0.910 | 6.0  | 0.375 | $4.20 \times 10^7$ | $1.45 \times 10^8$ | $6.80 \times 10^{-11}$ | 0.740  | $2.85 \times 10^7$ |
| 22.7           | $1.70 \times 10^{-12}$ | 0.910 | 9.0  | 0.375 | $4.68 \times 10^7$ | $1.80 \times 10^8$ | $6.80 \times 10^{-11}$ | 0.740  | $2.95 \times 10^7$ |
| 25.7           | $1.70 \times 10^{-12}$ | 0.910 | 13.0 | 0.375 | $5.05 \times 10^7$ | $1.95 \times 10^8$ | $6.80 \times 10^{-11}$ | 0.740  | $3.05 \times 10^7$ |
| 26.8           | $1.70 \times 10^{-12}$ | 0.910 | 13.0 | 0.375 | $5.05 \times 10^7$ | $1.95 \times 10^8$ | $6.80 \times 10^{-11}$ | 0.740  | $3.05 \times 10^7$ |
| 29.9           | $1.70 \times 10^{-12}$ | 0.910 | 13.0 | 0.375 | $4.98 \times 10^7$ | $1.95 \times 10^8$ | $6.80 \times 10^{-11}$ | 0.740  | $3.10 \times 10^7$ |
| 30.8           | $1.70 \times 10^{-12}$ | 0.910 | 13.0 | 0.375 | $4.98 \times 10^7$ | $1.90 \times 10^8$ | $6.80 \times 10^{-11}$ | 0.740  | $3.00 \times 10^7$ |

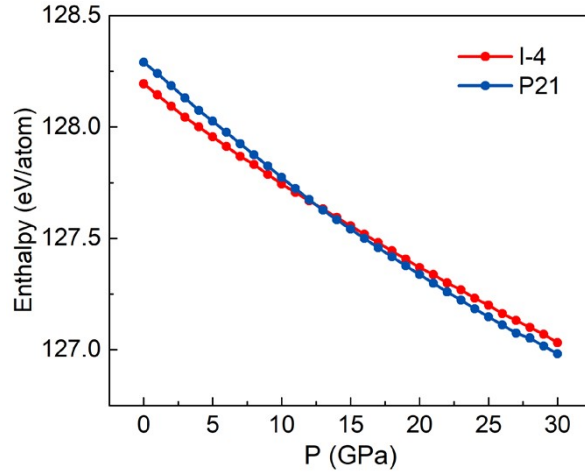

**Figure S1.** Calculated enthalpies per atom as function of pressure for the tetragonal phase (*I-4*) and the monoclinic phase (*P21*) in  $\text{LiNH}_2$ .

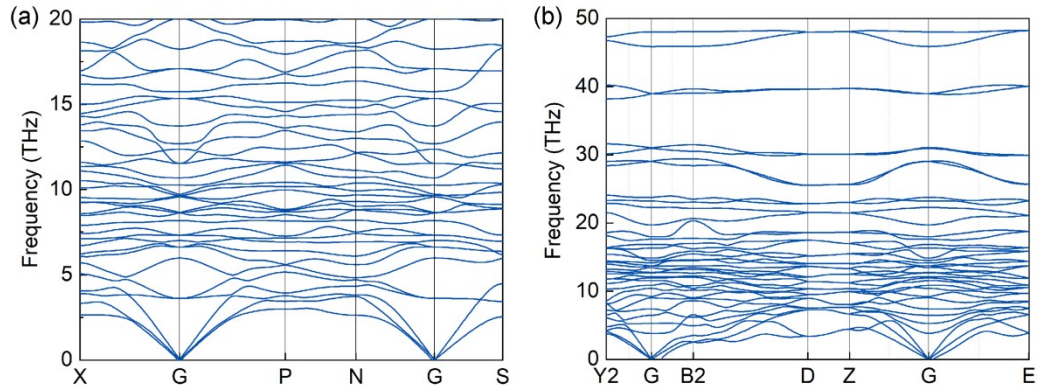

**Figure S2.** Calculated phonon dispersion of  $\text{LiNH}_2$  (a) in the tetragonal phase at 0 GPa and (b) in the monoclinic phase at 15 GPa.
